# Supplementary material for: Wafer-scale reliable switching memory based on 2-dimensional layered organic–inorganic halide perovskite
Source: Royal Society of Chemistry journal article supplement (doi:10.1039/c7nr05582j), 2017-01-01
Supplement: c7nr05582j1.pdf [file c7nr05582j1.pdf]

Supporting Information

**Wafer-Scale Reliable Switching Memory based on 2-Dimensional Layered Organic-Inorganic Halide Perovskite**

Ja-Young Seo,<sup>†a</sup> Jaeho Choi,<sup>†b</sup> Huo-Seon Kim,<sup>c</sup> Jaegyeom Kim,<sup>d</sup> June-Mo Yang,<sup>a</sup>

Can Cuhadar,<sup>a</sup> Ji Su Han,<sup>b</sup> Seung-Joo Kim,<sup>d</sup> Donghwa Lee,<sup>e</sup> Ho Won Jang<sup>\*b</sup> and

Nam-Gyu Park<sup>\*a</sup>

<sup>a</sup>School of Chemical Engineering, Energy Frontier Laboratory, Sungkyunkwan University, Suwon 16419, Korea

<sup>b</sup>Department of Materials Science and Engineering, Research Center for Advanced Materials, Seoul National University, Seoul 08826, Korea

<sup>c</sup>Laboratory of Photomolecular Science, Institute of Chemical Sciences and Engineering, Ecole Polytechnique Federale de Lausanne, Lausanne, Switzerland

<sup>d</sup>Department of Chemistry, Ajou University, Suwon 16499, Korea

<sup>e</sup>Department of Materials Science and Engineering, Pohang University of Science and Technology (POSTECH), Pohang 37673, Korea

\* Corresponding authors

H. W. J.: E-mail: [hwjang@snu.ac.kr](mailto:hwjang@snu.ac.kr)

N.-G. P.: E-mail: [npark@skku.edu](mailto:npark@skku.edu)

†These authors contributed equally to this work.

**Table S1.** Lattice parameters and unit cell volumes of the samples

| Sample                           |             | <i>a</i> (Å) | <i>b</i> (Å) | <i>c</i> (Å) | <i>V</i> (Å <sup>3</sup> ) |
|----------------------------------|-------------|--------------|--------------|--------------|----------------------------|
| MAPbI <sub>3</sub>               | bare        | 8.8528(7)    |              | 12.563(3)    | 984.6(2)                   |
|                                  | Ag          | 8.8518(7)    |              | 12.565(3)    | 984.6(2)                   |
|                                  | Ag_V        | 8.8559(7)    |              | 12.590(3)    | 987.4(2)                   |
|                                  | AgI_0.8mmol | 8.8594(7)    |              | 12.575(3)    | 987.0(2)                   |
| BA <sub>2</sub> PbI <sub>4</sub> | bare        | 8.862        | 8.682        | 27.509(1)    | 2116.6(4)                  |
|                                  | Ag          | 8.862        | 8.682        | 27.505(1)    | 2116.2(4)                  |

|             |       |       |           |           |
|-------------|-------|-------|-----------|-----------|
| Ag_V        | 8.862 | 8.682 | 27.512(1) | 2116.8(4) |
| AgI_0.8mmol | 8.862 | 8.682 | 27.615(1) | 2124.7(4) |

**Table S2.** Resistive switching properties of the BA<sub>2</sub>PbI<sub>4</sub> based memristor.

| Device structure                        | Switching voltage (V)     | Endurance (cycle) | Retention time (s) | Switching speed (ms) |
|-----------------------------------------|---------------------------|-------------------|--------------------|----------------------|
| Ag/BA <sub>2</sub> PbI <sub>4</sub> /Pt | 0.5 (SET)<br>-0.6 (RESET) | 250               | 10 <sup>3</sup>    | 10                   |

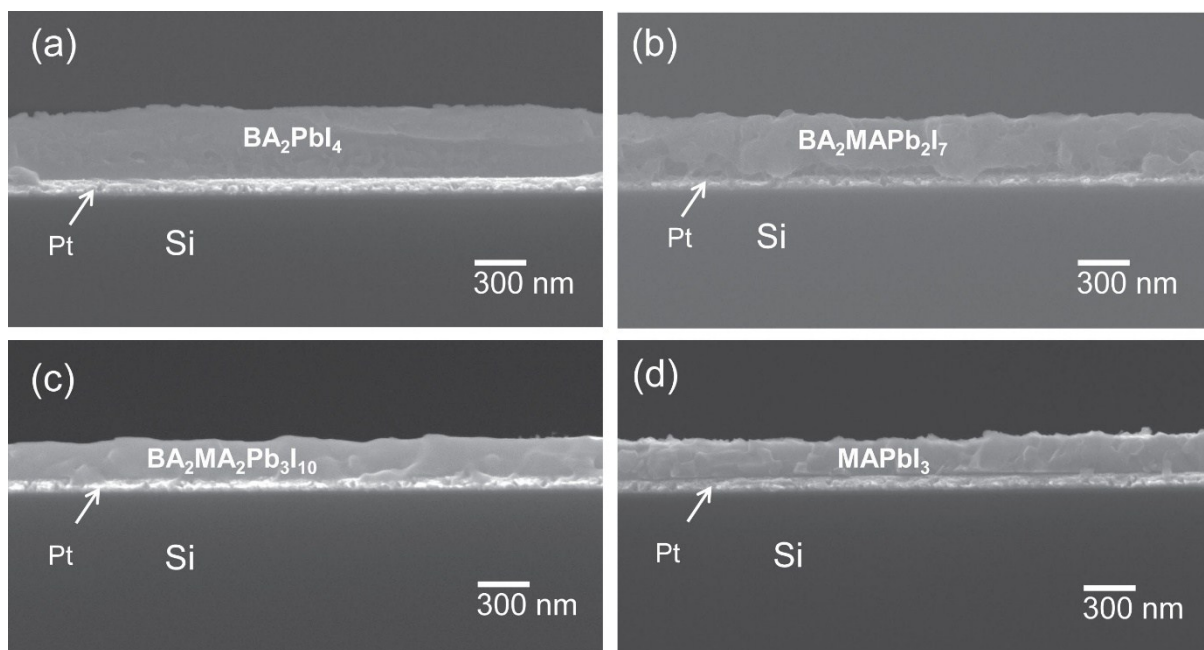

**Figure S1.** Cross-sectional scanning electron microscopy images for (a)  $\text{BA}_2\text{PbI}_4$ , (b)  $\text{BA}_2\text{MAPb}_2\text{I}_7$ , (c)  $\text{BA}_2\text{MA}_2\text{Pb}_3\text{I}_{10}$  and (d)  $\text{MAPbI}_3$ . The OHP thin films formed on the Pt coated silicon wafer.

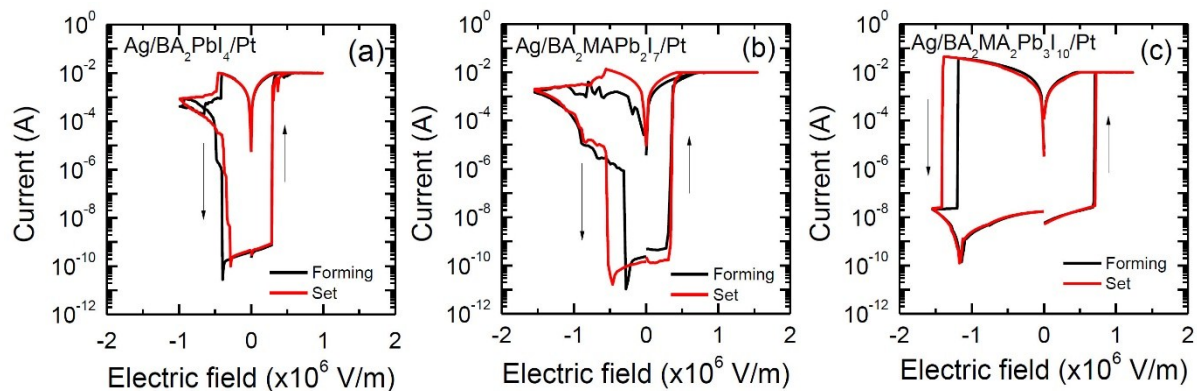

**Figure S2.** *I-V* curves for forming process and set process for (a) Ag/BA<sub>2</sub>PbI<sub>4</sub>/Pt; (b) Ag/BA<sub>2</sub>MAPb<sub>2</sub>I<sub>7</sub>/Pt; (c) Ag/BA<sub>2</sub>MA<sub>2</sub>Pb<sub>3</sub>I<sub>10</sub>/Pt. All *I-V* curves measured at one electrode and showed electroforming-free process

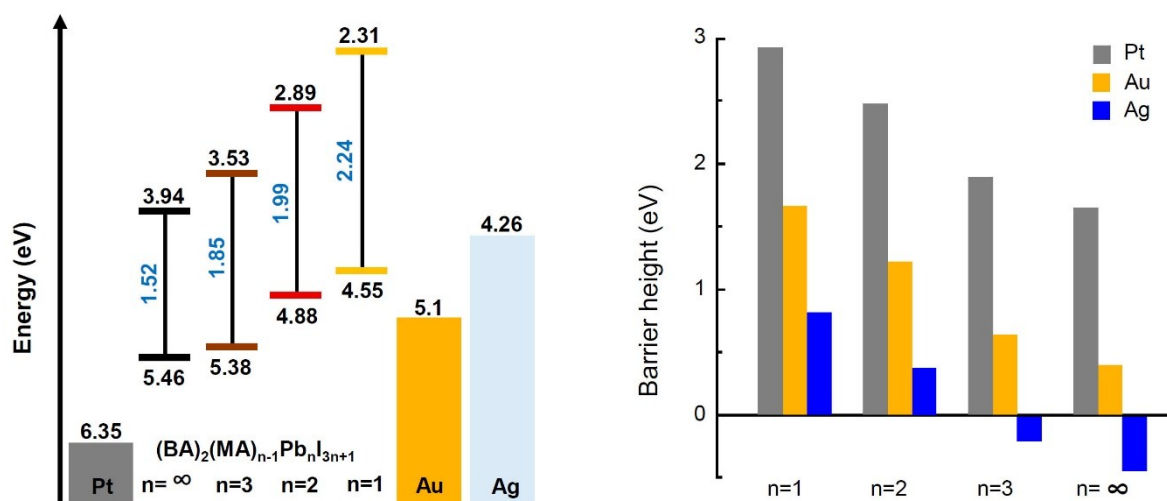

**Figure S3.** (a) Energy band diagram and (b) Schottky barrier heights at each metal electrode interface calculated by difference between the Fermi level of (BA)<sub>2</sub>(MA)<sub>n-1</sub>Pb<sub>n</sub>I<sub>3n+1</sub> and work function of metal.

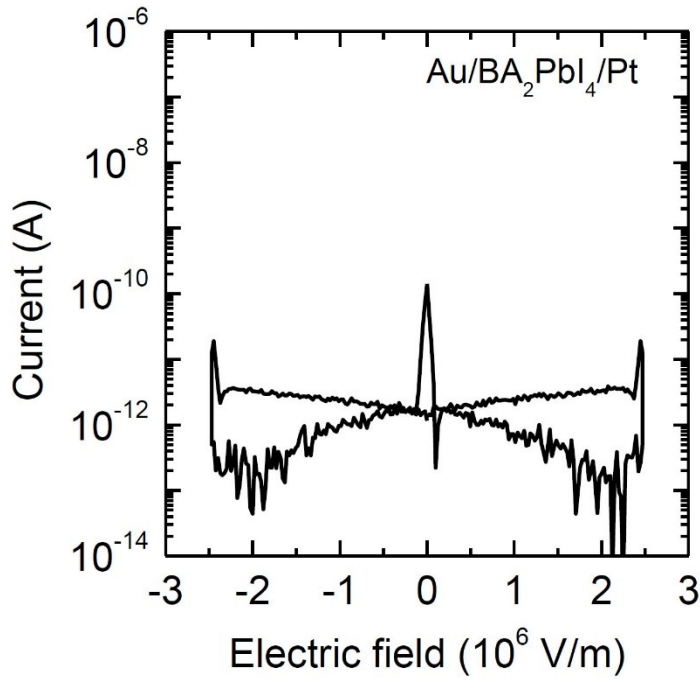

**Figure S4.**  $I$ - $V$  curve of Au/BA<sub>2</sub>PbI<sub>4</sub>/Pt device. The electric field was applied from positive sweeping to negative sweeping.

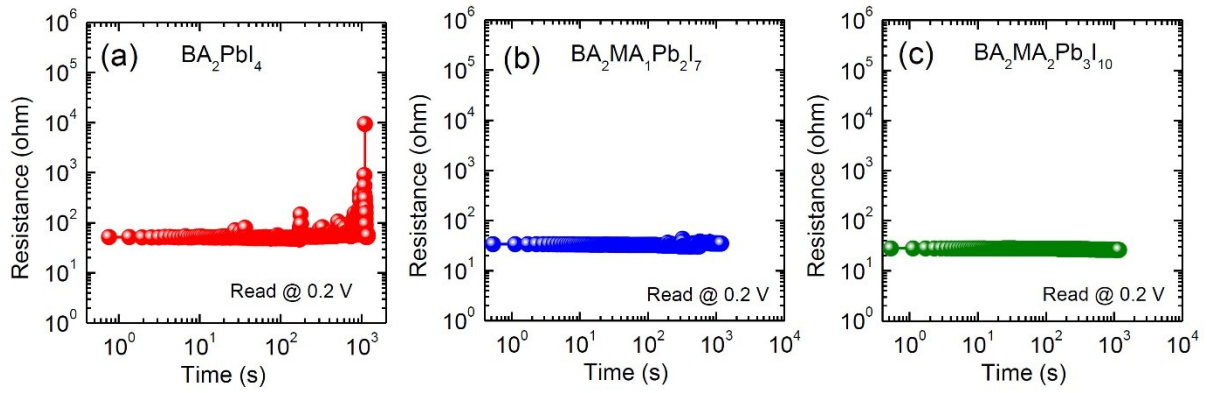

**Figure S5.** Retention for LRS of (a) Ag/BA<sub>2</sub>PbI<sub>4</sub>/Pt, (b) Ag/BA<sub>2</sub>MAPb<sub>2</sub>I<sub>7</sub>/Pt and (c) Ag/BA<sub>2</sub>MA<sub>2</sub>Pb<sub>3</sub>I<sub>10</sub>/Pt devices. The measured resistances are 50, 33 and 27 ohm for BA<sub>2</sub>PbI<sub>4</sub>, BA<sub>2</sub>MAPb<sub>2</sub>I<sub>7</sub>, and BA<sub>2</sub>MA<sub>2</sub>Pb<sub>3</sub>I<sub>10</sub>, respectively.

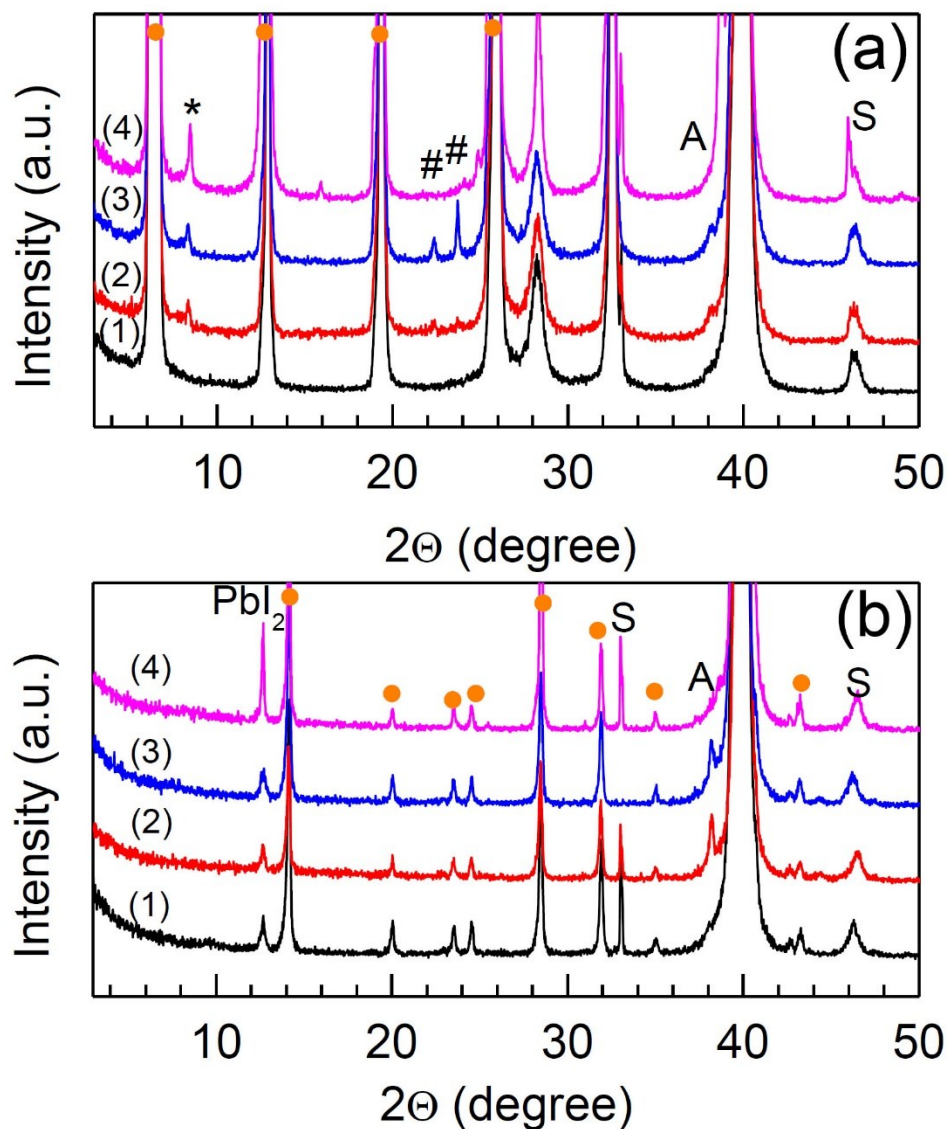

**Figure S6.** XRD patterns of four different samples for (a)  $\text{BA}_2\text{PbI}_4$  and (b)  $\text{MAPbI}_3$ , where (1) represents the as-prepared perovskite on Pt electrode (Perovskite/Pt), (2) the as-prepared perovskite with Ag electrode (Ag/perovskite/Pt), (3) the sample after 10 cycles of voltage sweeping (bias aged Ag/perovskite/Pt) and (4) a thin film of mixture of AgI and perovskite with 0.8 mmol of AgI with respect to 1 mol of perovskite (mixture perovskite/Pt). The area of Ag was  $0.09 \text{ cm}^2$  with the thickness of 150 nm. The voltage sweeping cycle was  $0.5 \text{ V} \rightarrow 0 \text{ V} \rightarrow -0.5 \text{ V} \rightarrow 0 \text{ V}$ . The perovskite phase is marked with orange circles. A indicates metallic Ag, # denotes AgI and S corresponds to peak from silicon wafer. \* denotes unknown peak.

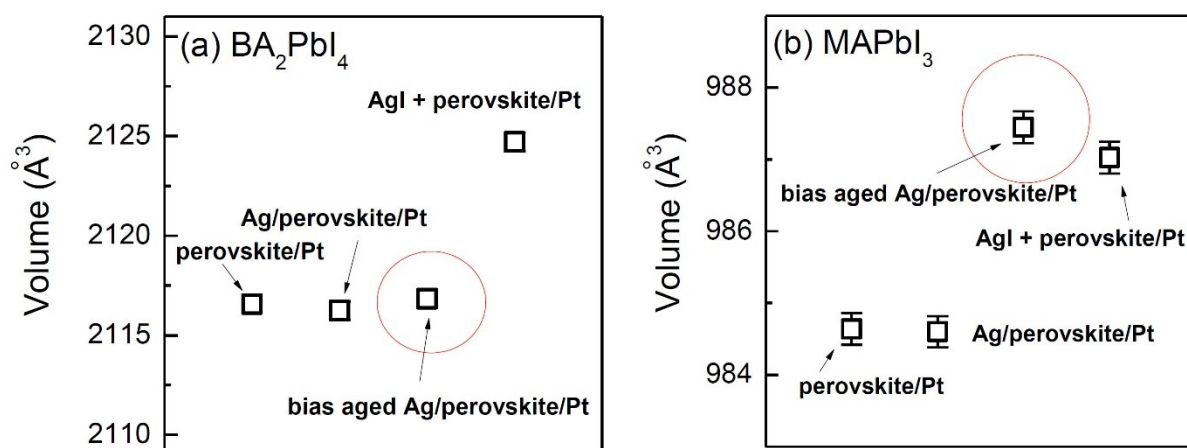

**Figure S7.** The unit cell volumes of three different samples mentioned in Figure S6 for (a)  $\text{BA}_2\text{PbI}_4$ , and (b)  $\text{MAPbI}_3$  calculated by lattice parameters listed in Table S1.

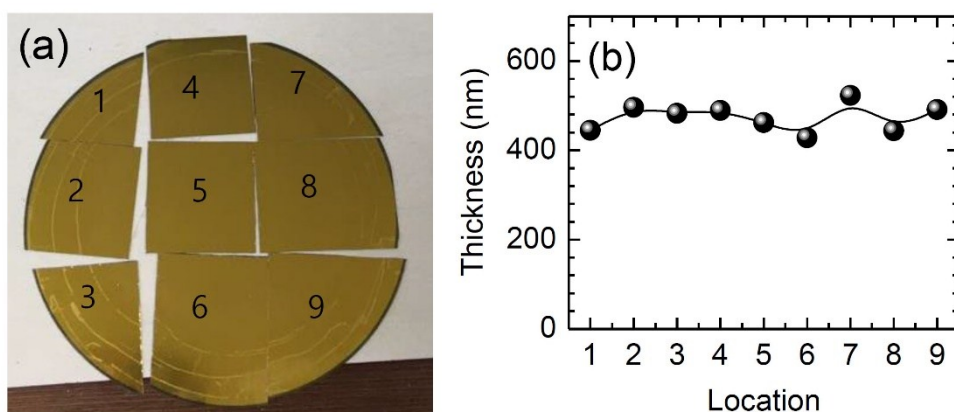

**Figure S8.**  $\text{BA}_2\text{PbI}_4$  film deposited on (a) Si wafer and (b) its thickness measured from different part designated in (a).
